# Supplementary material
Source: publisher figshare collection journal article supplement (https://frontiersin.figshare.com/ndownloader/files/11059919)
Supplement: Supplementary file [file 11059919]

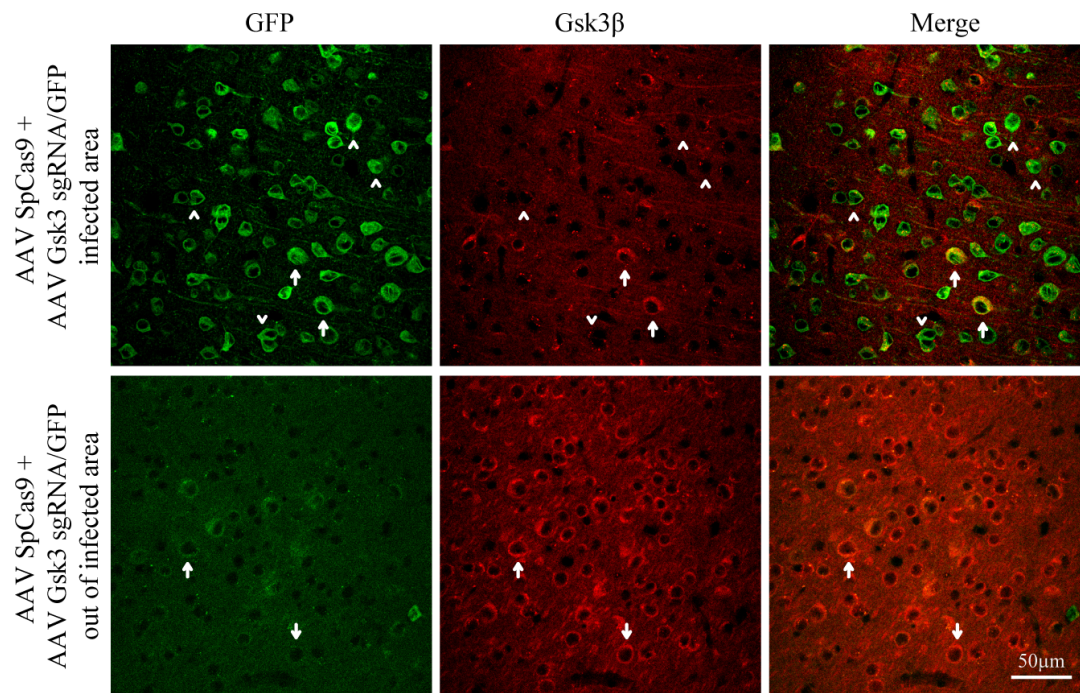

Figure S1

**Supplementary Figure S1.**

Immunofluorescent staining of virus injected brain sections with Gsk3β antibody (Gsk3β red, GFP green). Arrows indicate GFP+Gsk3β+ (double positive) cells, arrowheads indicate cells only positive for GFP. Note absence of Gsk3β+ cells only in virus infected area in contrast to out of virus infected area.

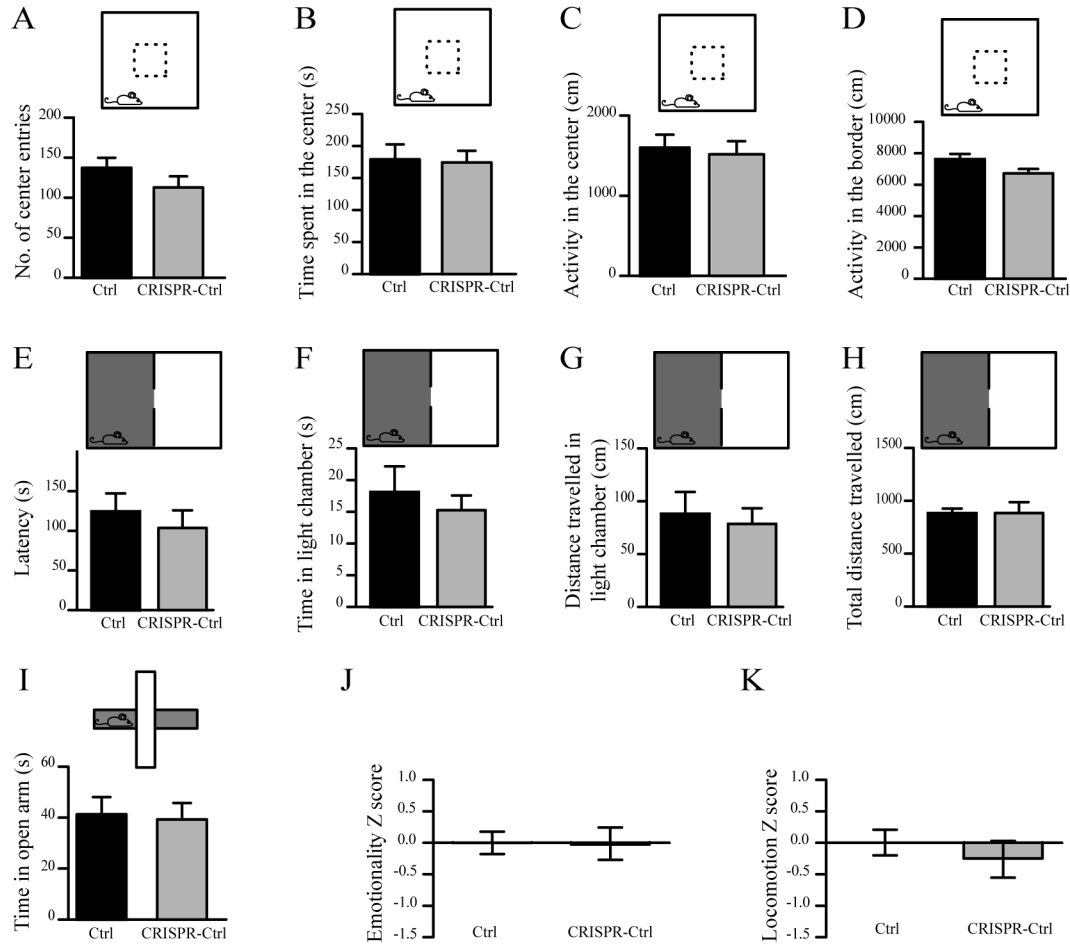

Figure S2

### Supplementary Figure S2. Cas9 expression does not alter anxiety-related behaviors

(A-D). Open field test for mice injected with AAV GFP (n=8) and AAV SpCas9 + AAV GFP (n=10). Graphs represent (A) Center entries (AAV GFP 137±12.8, AAV SpCas9 + AAV GFP 112.8±14), (B) time spent in the center (AAV GFP 178.9s±23.7, AAV SpCas9 + AAV GFP 174.3s±18.2), (C) horizontal activity in the center (AAV GFP 1597cm±165, AAV SpCas9 + AAV GFP 1518±163) and (D) horizontal activity in the border (AAV GFP , AAV SpCas9 + AAV GFP ). (E-H). Dark-light emergence test for mice injected with AAV GFP (n=9) and AAV SpCas9 + AAV GFP (n=8). Graphs represent (E) Latency to cross the border from dark to light

compartment (AAV GFP  $124.3s \pm 23$ , AAV SpCas9 + AAV GFP  $103.5s \pm 22.3$ ), **(F)** time in the light chamber (AAV GFP  $18.1s \pm 4$ , AAV SpCas9 + AAV GFP  $15.2s \pm 2.3$ ), **(G)** distance travelled in the light chamber (AAV GFP  $88.1cm \pm 20.6$ , AAV SpCas9 + AAV GFP  $78.5cm \pm 14.9$ ) and **(H)** total distance travelled during all 5 minutes of the test (AAV GFP  $881.3cm \pm 45.5$ , AAV SpCas9 + AAV GFP  $884.4cm \pm 103.2$ ). **(I)** Elevated plus maze for mice injected with AAV GFP ( $41.3s \pm 6.75$  n=10) and AAV SpCas9 + AAV GFP ( $39.3s \pm 6.45$  n=10). Graph represents time spent in the open arm during all 10 minutes of the test. **(J)** Emotionality Z-score for mice injected with AAV GFP ( $-5.47 \times 10^{-5} \pm 0.1784$ , n=11) and AAV SpCas9 + AAV GFP ( $-0.02619 \pm 0.2433$ , n=10). **(K)** Locomotion Z-score for mice injected with AAV GFP ( $9.021 \times 10^{-6} \pm 0.6949$ , n=11) and AAV SpCas9 + AAV GFP ( $-0.2469 \pm 0.9687$ , n=10). Error bars show standard error of the mean (SEM). (\* $p < 0.05$ , \*\* $p < 0.01$ , \*\*\* $p < 0.001$ , Student's *t*-test).
